# Supplementary material for: Lifetimes of pre-reactive complexes of peroxy radicals revisited: thermostat effects, temperature dependence and highly oxygenated molecules
Source: Royal Society of Chemistry journal article supplement (doi:10.1039/d4ea00037d), 2024-01-01
Supplement: d4ea00037d1.pdf [file d4ea00037d1.pdf]

**Supporting Information:**

**Lifetimes of pre-reactive complexes of peroxy  
radicals revisited: Thermostat effects,  
temperature dependence and highly oxygenated  
molecules**

Christopher David Daub,\* Robert Skog, and Theo Kurtén\*

*Department of Chemistry, University of Helsinki, P.O. Box 55, Helsinki 00014, Finland*

E-mail: christopher.daub@helsinki.fi; theo.kurten@helsinki.fi

## Comparison between old and new fits of $\tau_L$ versus $k_{expt}$

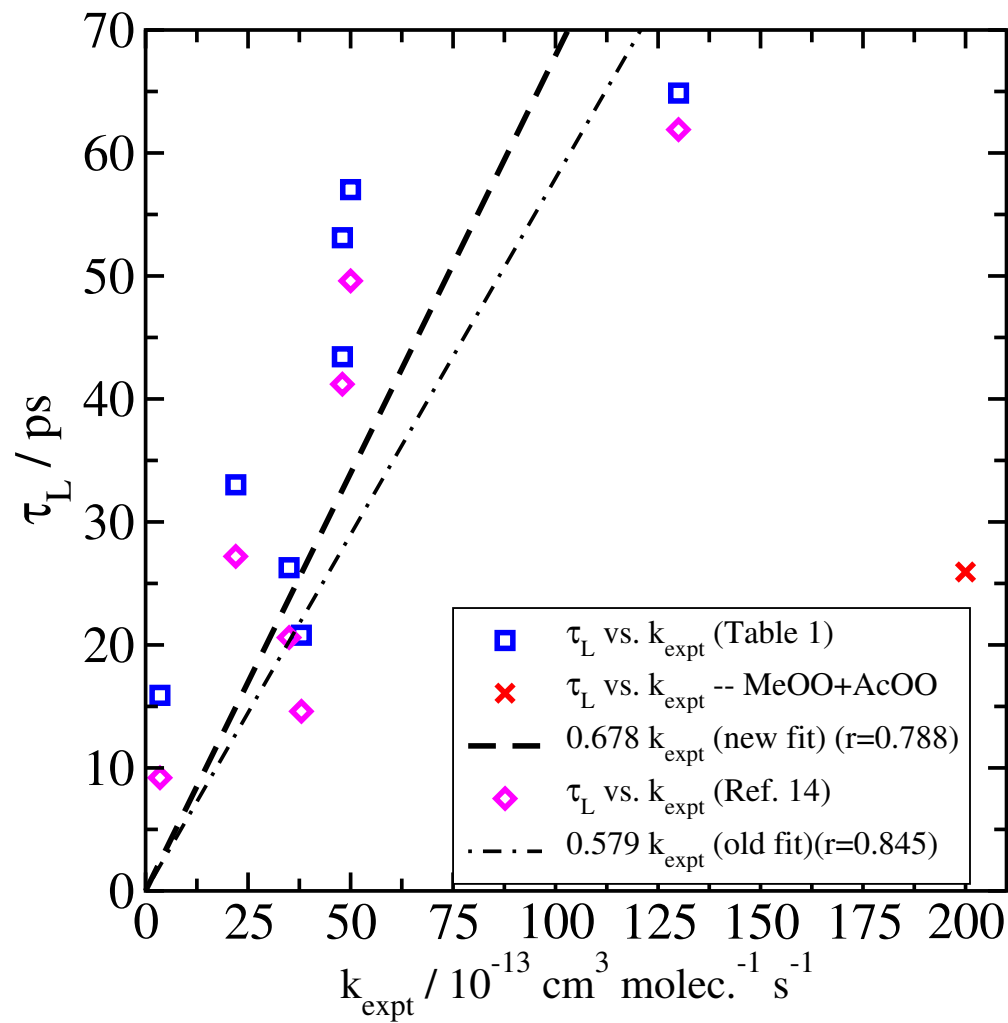

Figure S1: Comparison of the correlation between  $\tau_L$  and  $k_{expt}$  determined in our previous work (Ref. 14 in the main paper, magenta diamonds and dash-dotted line) where the equilibration was done with the Nosé-Hoover thermostat, and the current work (blue squares and dashed line) using the Langevin thermostat.

## Association time histograms at varying temperatures

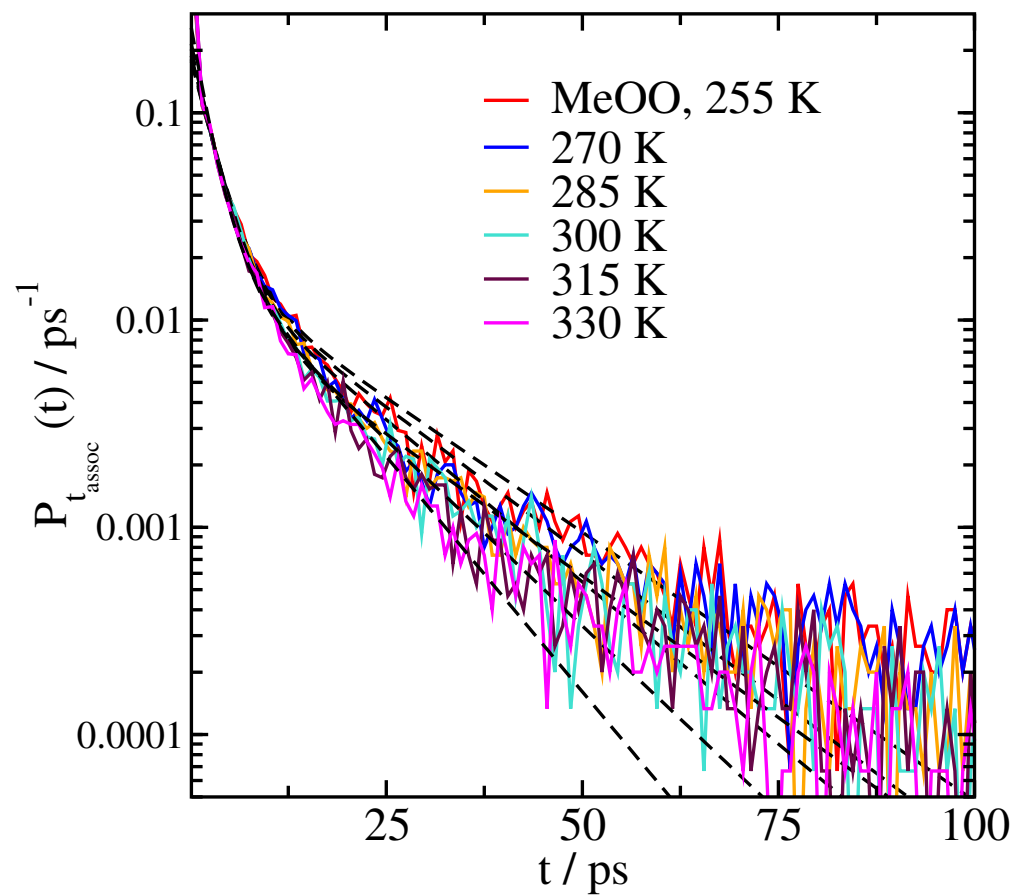

Figure S2: Association time histograms for complexes of two MeOO at different temperatures, and fits to Equation 2 (dashed lines).

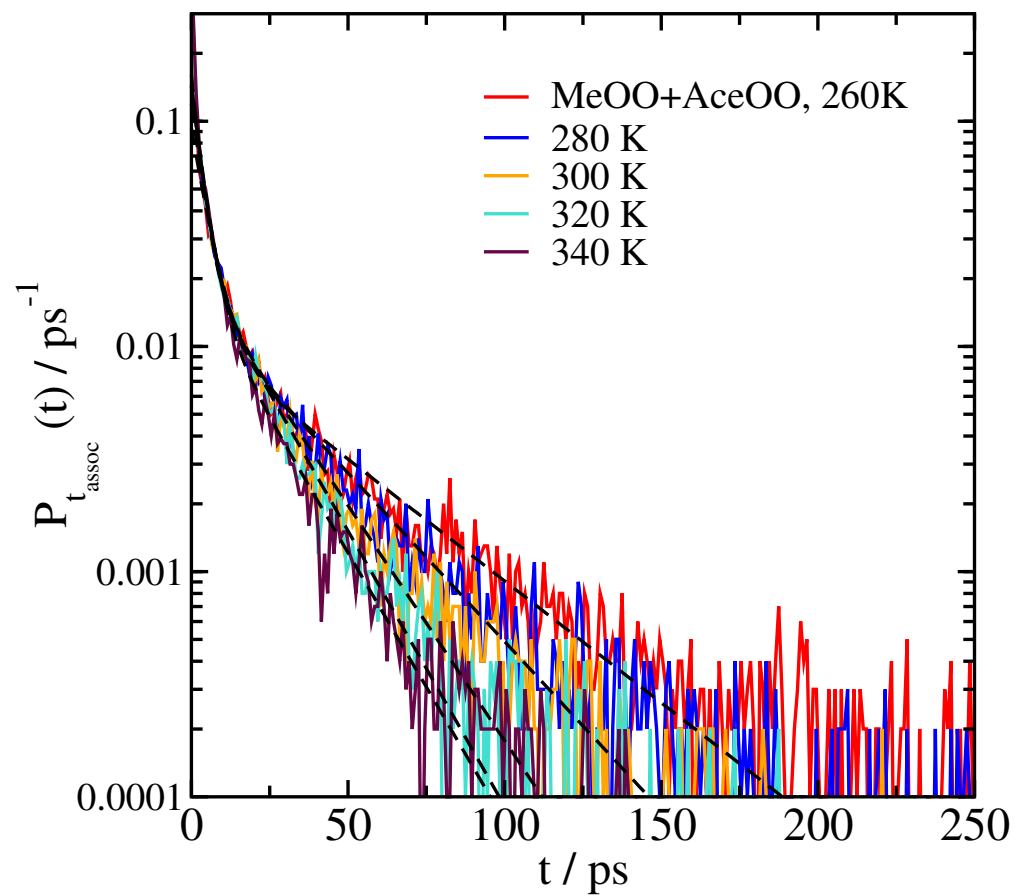

Figure S3: Association time histograms for AceOO + MeOO complexes at different temperatures, and fits to Equation 2 (dashed lines).

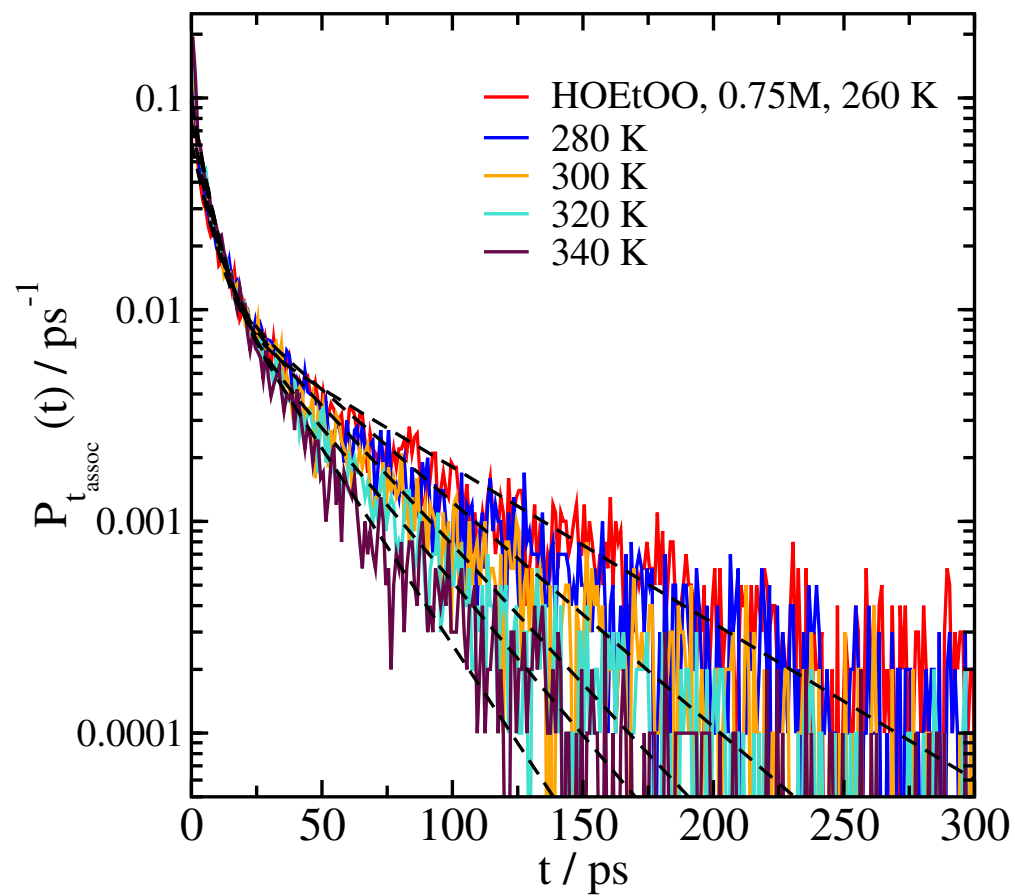

Figure S4: Association time histograms for complexes of two HOEtOO at different temperatures, and fits to Equation 2 (dashed lines).

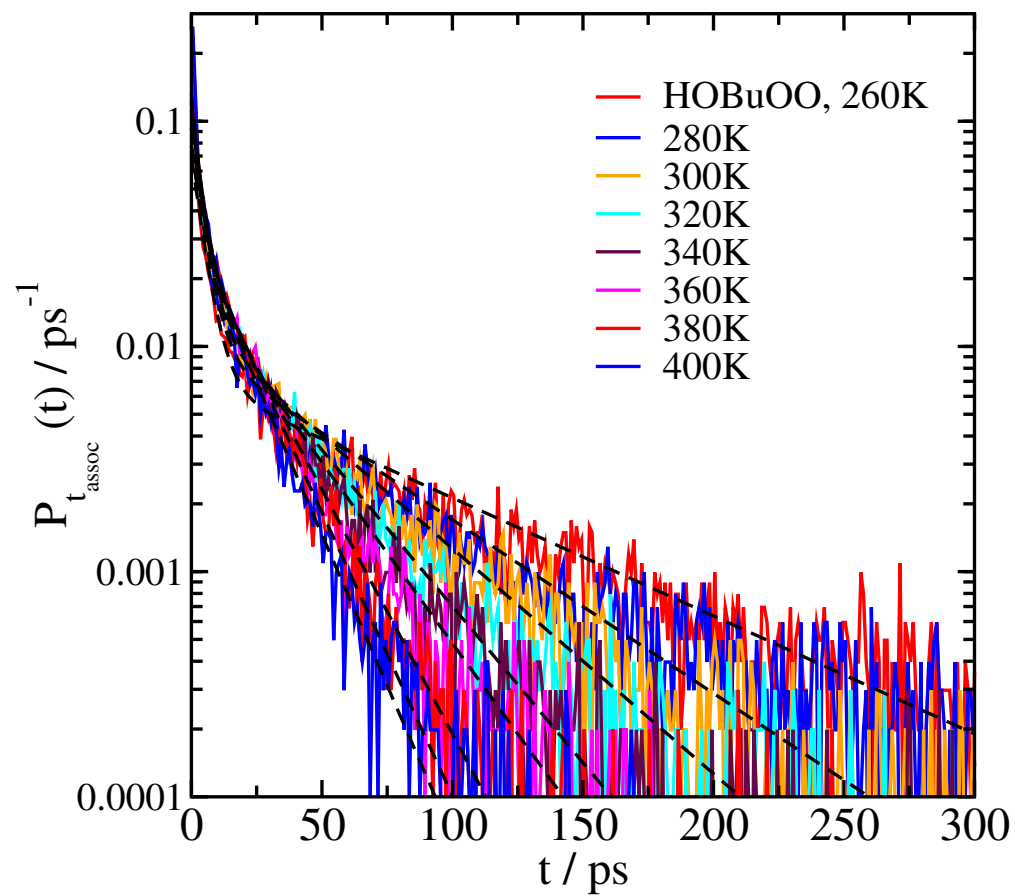

Figure S5: Association time histograms for complexes of two HOBUOO at different temperatures, and fits to Equation 2 (dashed lines).

## Input files for LAMMPS

We have attached two examples of LAMMPS 'input' and 'data' files which can be used to initiate a single collision trajectory. Different collision trajectories can be generated by randomly changing the relative orientations of the molecules as well as changing the random number seeds for the initial velocity generation and the random friction force in the Langevin thermostat used during the equilibration phase.
